# Supplementary material for: Rare earth indates (RE: La–Yb): influence of the synthesis route and heat treatment on the crystal structure
Source: Royal Society of Chemistry journal article supplement (doi:10.1039/c7dt04849a), 2018-01-01
Supplement: c7dt04849a1.pdf [file c7dt04849a1.pdf]

## Supporting Information

### Rare earth indates (RE: La-Yb): Influence of synthesis route and heat treatment on crystal structure

Rakesh Shukla<sup>a</sup>, Vinita Grover <sup>a,e\*</sup>, Kancharlapalli Srinivasu<sup>b</sup>, Barnita Paul<sup>c</sup>, Anushree Roy<sup>c</sup>,  
Ruma Gupta<sup>d</sup> and Avesh Kumar Tyagi<sup>a,e\*</sup>

<sup>a</sup>Chemistry Division, Bhabha Atomic Research Centre, Mumbai-400085, India

<sup>b</sup>Theoretical Chemistry Section, Bhabha Atomic Research Centre, Mumbai-400085, India

<sup>c</sup>Department of Physics, Indian Institute of Technology, Kharagpur, 721302, India

<sup>d</sup>Fuel Chemistry Division, Bhabha Atomic Research Centre, Mumbai-400085, India

<sup>e</sup>Homi Bhabha National Institute, Mumbai- 400094, India

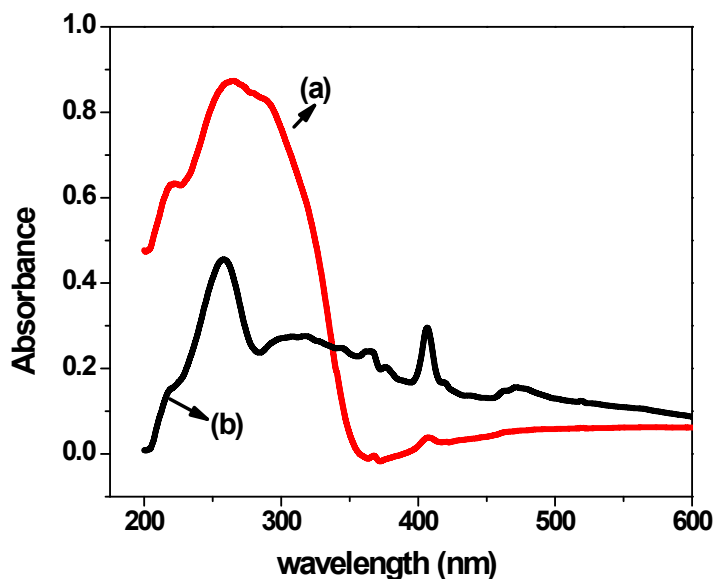

Figure S1: DR-UV plot for (a) hexagonal SmInO<sub>3</sub> and (b) orthorhombic SmInO<sub>3</sub>.

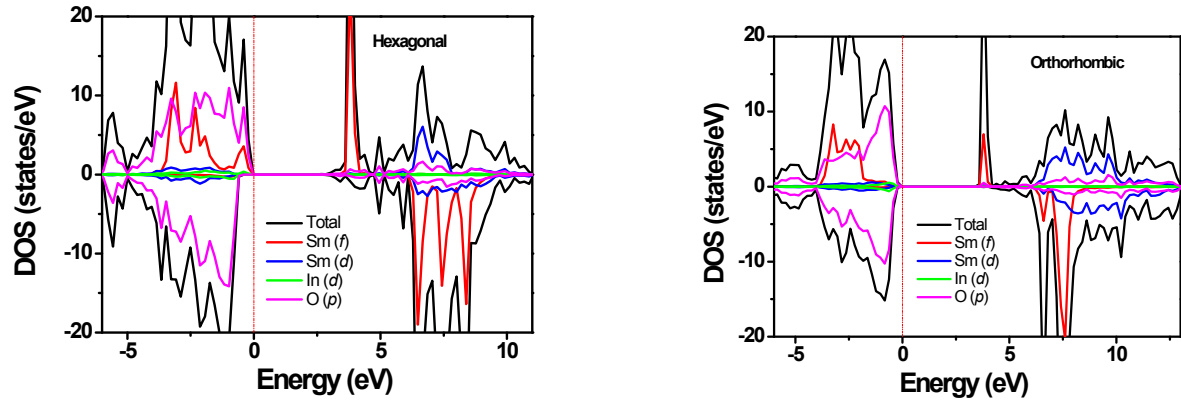

Figure S2: Spin polarised total and projected density of states (DOS) of (a) Hexagonal and (b) orthorhombic  $\text{SmInO}_3$  calculated using HSE06 method.

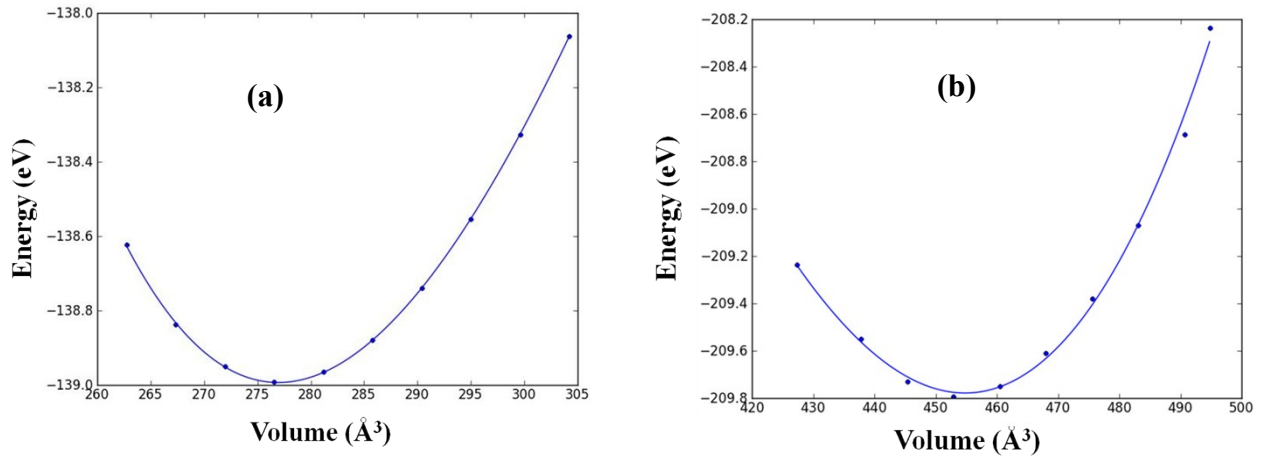

Figure S3. Variation of energy with volume fitted to Birch-Murnaghan equation of state for (a) Orthorhombic and (b) Hexagonal  $\text{SmInO}_3$ .

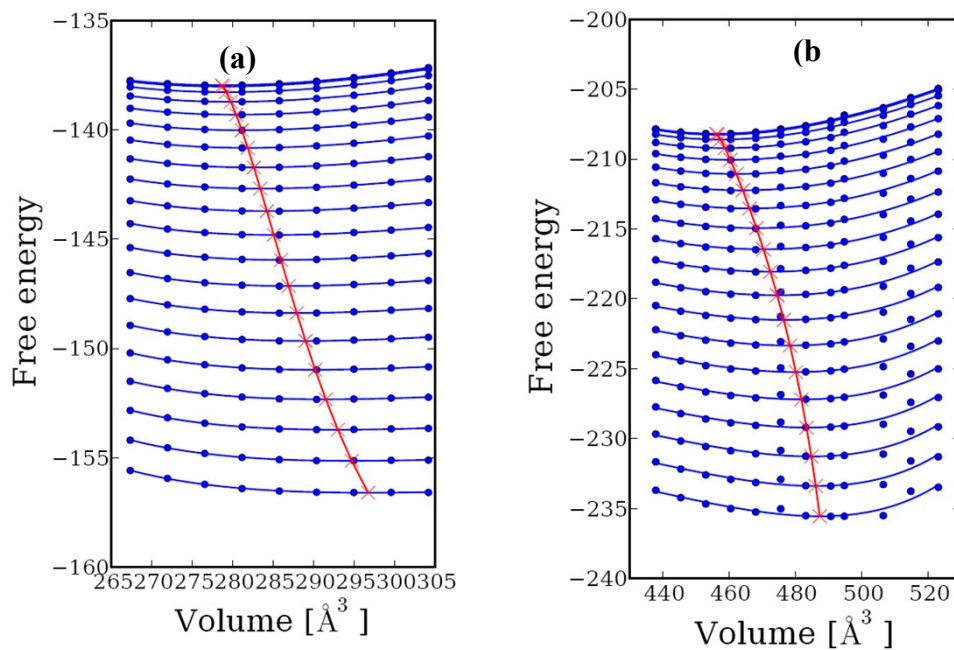

Figure S4. Variation of free energy with respect to volume at different temperatures from 0 K to 2000 K for (a) Orthorhombic and (b) Hexagonal  $\text{SmInO}_3$ .
